# Supplementary material for: Conservation and evolutionary divergence in the activity of receptor-regulated smads
Source: PubMed Central journal article supplement (PMC3500652; doi:10.1186/2041-9139-3-22), 2012-10-01
Supplement: 2041-9139-3-22-S1.pdf [file 2041-9139-3-22-S1.pdf]

# Additional File 1.

|        | MH1 Domain                                                                                                     | Nuclear localization signal |         |
|--------|----------------------------------------------------------------------------------------------------------------|-----------------------------|---------|
| HS2    | MSSILP-----FTPPVVKRLLGWKKSAGGSGGAGGGEQNGQEEKWEKCAVKSLSVKLLKKTGR-LDELEKAITTQNCNTKCVTIPSTCSEIWGLSTPNTIDQWDTTGLYS |                             | [ 103 ] |
| XS2    | MSSILP-----FTPPVVKRLLGWKKSASGTTGAGGGEQNGQEEKWEKCAVKSLSVKLLKKTGQ-LDELEKAITTQNCNTKCVTIPSTCSEIWGLSTPNTIDQWDTTGLYS |                             | [ 103 ] |
| HS3    | MSSILP-----FTPPVVKRLLGWK-----GEQNGQEEKWEKCAVKSLSVKLLKKTGQ-LDELEKAITTQNVNTKCITIP-----                           |                             | [ 68 ]  |
| XS3    | MSSILP-----FTPPVVKRLLGWK-----GEQNGQEEKWEKCAVKSLSVKLLKKSQG-LDELEKAITTQISISTKCTIP-----                           |                             | [ 68 ]  |
| dSmad2 | M-----LP-----FTPPVVKRLLALK-----GNEDNSVEGKWEKAVKNLVKIKKNSQ-LDELEKAITTQNCQTRCVTP-----                            |                             | [ 66 ]  |
| NvS23  | MTSLLP-----FTPPVVKRLLGWKR-----GGDE-----DDKWAEKAVKSLSVKLLKKTGG-LDELEKAITNPGVATKCVTIP-----                       |                             | [ 66 ]  |
| HS9a   | MHSTTPIS-----SLFSFTSPAVKRLLGWQ-----GDE-----EEKWAEKAVDSLKVKLLKKGKAMELELALSCPGQPSKCVTIP-----                     |                             | [ 72 ]  |
| HS9b   | MHSTTPIS-----SLFSFTSPAVKRLLGWQ-----GDE-----EEKWAEKAVDSLKVKLLKKGKAMELELALSCPGQPSKCVTIP-----                     |                             | [ 72 ]  |
| XS8a   | MHASTPIS-----SLFTFTSPAVKRLLGWQ-----GDE-----EEKWAEKAVDSLKVKLLKKGKAMELELALSCPGQPSKCVTIP-----                     |                             | [ 72 ]  |
| XS8b   | MHASTPIS-----SLFSFTSPAVKRLLGWQ-----GDE-----EEKWAEKAVDSLKVKLLKKGKAMELELALSCPGQPSKCVTIP-----                     |                             | [ 72 ]  |
| HS1    | MNVT-----SLFSFTSPAVKRLLGWQ-----GDE-----EEKWAEKAVDALVKLLKKGKAMELEKALSCPGQPSNCVTIP-----                          |                             | [ 68 ]  |
| XS1    | MNVT-----SLFSFTSPAVKRLLGWQ-----GDE-----EEKWAEKAVDALVKLLKKGKAMELEKALSCPGQPSNCVTIP-----                          |                             | [ 68 ]  |
| HS5    | MTSMA-----SLFSFTSPAVKRLLGWQ-----GDE-----EEKWAEKAVDALVKLLKKGKAMELEKALSSPGQPSKCVTIP-----                         |                             | [ 69 ]  |
| dMAD   | MDTDDVESNTSSAMSTLGSLSFTSPAVKRLLGWQ-----GDE-----EEKWAEKAVDSLKVKLLKKGKAIIELELALSCPGQPSKCVTIP-----                |                             | [ 82 ]  |
| NvS15  | MSSMA-----SLFSFTSPAVKRLLGWQ-----GDE-----EEKWAEKAIESLKVLLKKGKALELLEKALSNPQQSKCVTIA-----                         |                             | [ 69 ]  |

|        | DNA binding β hairpin                                                                                                     | Hydrophobic core | Coordinate a zinc atom at the center |         |
|--------|---------------------------------------------------------------------------------------------------------------------------|------------------|--------------------------------------|---------|
| HS2    | FSEQTRSLDGLRQLVSHRKLPHVYICRLWRWPDLSHSHHELKAIENCEYAFNLKKEDEVCPNYHYQRVETPVLPVLPVRHTEILTELPPLDDYTHSIPENTNF-----              |                  |                                      | [ 206 ] |
| XS2    | FSEQTRSLDGLRQLVSHRKLPHVYICRLWRWPDLSHSHHELKAVENCEYAFNLKKEDEVCPNYHYQRVETPVLPVLPVLRHTEILTELPPLDDYTHSIPENTNF-----             |                  |                                      | [ 206 ] |
| HS3    | -----RSLDGLRQLVSHRKLPHVYICRLWRWPDLSHSHHELKAMELCEFAFNMKKDEVCPNYHYQRVETPVLPVLPVLRHTEIPAEFPPLDDYTHSIPENTNF-----              |                  |                                      | [ 166 ] |
| XS3    | -----RSLDGLRQLVSHRKLPHVYICRLWRWPDLSHSHHELKAMELCEFAFNMKKDEVCPNYHYQRVETPVLPVLPVLRHTEIPAEFPPLDDYTHSIPENTNF-----              |                  |                                      | [ 166 ] |
| dSmad2 | -----RSKPAPAGEHLRKLPHVYICRLWRWPDLSQNELKPLDHCYAFHLRKEEICINPYHYKIELSILVPSKLPPTPDSIVDYP-LDNHTHQPNTDYNAAIIRASASLPPQYME        |                  |                                      | [ 180 ] |
| NvS23  | -----RSLDGLRQLVSHRKLPHVYICRLWRWPDLSHSHHELKPIEACEFAFSLKKEDEVCPNYHYQRVETPVLPVLPVLRHTEIPAEFPPLDDYTHSIPENTNF-----             |                  |                                      | [ 163 ] |
| HS9a   | -----RSLDGLRQLVSHRKLPHVYICRVWRWPDLSHSHHELKPLECEFPFGSKQKEVCINPYHYRRVETPVLPVLPVLRHSEYNPQLSLLAKFRSASLHSEPLMHNATYPPDSFQQPPCS  |                  |                                      | [ 187 ] |
| HS9b   | -----RSLDGLRQLVSHRKLPHVYICRVWRWPDLSHSHHELKPLECEFPFGSKQKEVCINPYHYRRVETPVLPVLPVLRHSEYNPQLSLLAKFRSASLHSEPLMHNATYPPDSFQQPPCS  |                  |                                      | [ 187 ] |
| XS8a   | -----RSLDGLRQLVSHRKLPHVYICRVWRWPDLSHSHHELKPMCECFPFSGKQKVCINPYHYRRVETPVLPVLPVLRHSEYNPQLSLLAKFRSASLHSEPLMHNATYPPDSFQQPPRT   |                  |                                      | [ 187 ] |
| XS8b   | -----RSLDGLRQLVSHRKLPHVYICRVWRWPDLSHSHHELKPMCECFPFSGKQKVCINPYHYRRVETPVLPVLPVLRHSEYNPQLSLLAKFRSASLHSEPLMHNATYPPDSFQQPPRT   |                  |                                      | [ 187 ] |
| HS1    | -----RSLDGLRQLVSHRKLPHVYICRVWRWPDLSHSHHELKPLECEFPFGSKQKEVCINPYHYRRVETPVLPVLPVLRHSEYNPQHSLLAQFRNLGQNEPHMPLNATYPPDSFQQPNSH  |                  |                                      | [ 182 ] |
| XS1    | -----RSLDGLRQLVSHRKLPHVYICRVWRWPDLSHSHHELKPLECEFPFGSKQKEVCINPYHYRRVETPVLPVLPVLRHSEYNPQHSLLAQFRNLGQNEPHMPLNATYPPDSFQQPNSH  |                  |                                      | [ 182 ] |
| HS5    | -----RSLDGLRQLVSHRKLPHVYICRVWRWPDLSHSHHELKPLDICEFPFGSKQKEVCINPYHYRRVETPVLPVLPVLRHSEYNPQHSLLAQFRNLGQNEPHMPLNATYPPDSFQQPNST |                  |                                      | [ 183 ] |
| dMAD   | -----RSLDGLRQLVSHRKLPHVYICRVWRWPDLSHSHHELKPLELQYFPFAKQKEVCINPYHYRRVETPVLPVLPVLRHSEYNPQHSLLAQFRNLGQNEPHMPLNATYPPDSFQQPNST  |                  |                                      | [ 197 ] |
| NvS15  | -----RSLDGLRQLVSHRKLPHVYICRVWRWPDLSHSHHELKPLECEYAFGLKQKEVCINPYHYRRVETPVLPVLPVLRHSEYNPQHSLLAQFRNLGQNEPHMPLNATYPPDSFQQPNST  |                  |                                      | [ 184 ] |

|        |                                                                                                           |  |         |
|--------|-----------------------------------------------------------------------------------------------------------|--|---------|
| HS2    | -----PAGIEPQSNYIPE---TPPPGYISEDGETSDQQLNQSMDTGSPAEL-LSPTTSLPVNHSLLDLPVPT                                  |  | [ 267 ] |
| XS2    | -----PAGIEPQSNYIPE---TPPPGYISEDGETSDQQLNQSMDTGSPAEL-LSPTTSLPVNHSLLDLPVPT                                  |  | [ 267 ] |
| HS3    | -----PAGIEPQSN- IPE---TPPPGYISEDGETSDHQMNSMDAGSPN---LSPNPMSPAHNNDLQPVPT                                   |  | [ 225 ] |
| XS3    | -----PAGIEPQSNYIPE---TPPPGYISEDGETSDQ-MNHSIDTGSPN---LSPNPMSPAHNNDLQPVPT                                   |  | [ 225 ] |
| dSmad2 | LGAGPVSVSSASSTPATAAGGGGGPSSSSSSSSAAAYQQQQQLSFGQNMDSQSSVLSVSSIPNTGTPPPGYMSDGDIPDNDNMMSRLTP---PA-DA-A---PVM |  | [ 286 ] |
| NvS23  | -----PTQEPNTSQYHIIQGFPTD-YISDDACS-DMSGEHSQNNQIDQLSPADPSNNLI---DAQPIQ                                      |  | [ 223 ] |
| HS9a   | ALPPSPSHAFSQSPTASYPHSPGSPSEPEPSYQHSV-D-----TPPLPYHATEASETQSGQPVADATDRHVLSIPNG-----DFRPVC                  |  | [ 266 ] |
| HS9b   | ALPPSPSHAFSQSPTASYPHSPGSPSEPEPSYQHS-----DFRPVC                                                            |  | [ 229 ] |
| XS8a   | PFSSSPSNIPFQSPNTVGYPDSRPSSTDPGSPYQI-TE-----TPPPYINAPDLQGNQNRPTADPAECQLVLSALNR-----DFRPVC                  |  | [ 265 ] |
| XS8b   | PFSSSPSNIPFQSPNTVGYPDSRPSSTDPGSPYQI-TE-----TPPPYINAPDLQGNQNRPTADPAECQLVLSALNR-----DFRPVC                  |  | [ 265 ] |
| HS1    | PFPHSPNSYPNSPSSSYYPHSTPSSDPGSPFQMPAD-----TPPPYALPELDPMTQDGSQMDTMMMPPLPSEINRG-----DVQAVA                   |  | [ 264 ] |
| XS1    | PFPHSPNSYPNSPSSSYYPHSPASSDPGSPFQIPAD-----TPPPYAMPPEQDQMSQMDTMMMPVNSIQD-INRA-----DVQAVA                    |  | [ 263 ] |
| HS5    | PPPLSPNSYPSPASSST---YPNPASSGPGSPFQIPAD-----TPPPYAMPPEQDQMSQMDTMMMPVNSIQD-INRA-----DVQAVA                  |  | [ 264 ] |
| dMAD   | TSVGSPPSSVNSPNSPYDLSA-----GTPPPYSPSEDGNSNPNDDGGQLLDAQMGDVAQVS-----                                        |  | [ 254 ] |
| NvS15  | PSFDMADSGAGYMSDDGSPRPEPNAMVDVFN-----SPP---SIS-QSAEAMSHVTAVN-----                                          |  | [ 236 ] |

|        | MH2 Doman                                                                                                               | Trimer stabilization | Trimerization sites | Hydrophobic pocket |         |
|--------|-------------------------------------------------------------------------------------------------------------------------|----------------------|---------------------|--------------------|---------|
| HS2    | YSEPAFWCSIAAYELNQRVGETFHASQPSLTVDFGTDPSN--SERFCLGLLSNVNRNATVEMTRRHIGRQVRLYYIGGVEVFAECLSDSAIFVQSPICNRYWIPATVCKIPPGCNLKIF |                      |                     |                    | [ 385 ] |
| XS2    | YSEPAFWCSIAAYELNQRVGETFHASQPSLTVDFGTDPSN--SERFCLGLLSNVNRNATVEMTRRHIGRQVRLYYIGGVEVFAECLSDSAIFVQSPICNRYWIPATVCKIPPGCNLKIF |                      |                     |                    | [ 385 ] |
| HS3    | YCEPAFWCSISYYELNQRVGETFHASQPSMTVDGFTDPSN--SERFCLGLLSNVNRNAAVELTRRHIGRQVRLYYIGGVEVFAECLSDSAIFVQSPICNRYWIPATVCKIPPGCNLKIF |                      |                     |                    | [ 343 ] |
| XS3    | YCEPAFWCSISYYELNQRVGETFHASQPSMTVDGFTDPSN--SERFCLGLLSNVNRNAAVELTRRHIGRQVRLYYIGGVEVFAECLSDSAIFVQSPICNRYWIPATVCKIPPGCNLKIF |                      |                     |                    | [ 343 ] |
| dSmad2 | YHEPAFWCSISYYELNQRVGETFHASQPSITVDGFTDPSN--SERFCLGLLSNVNRNEVVEVTRRHIGRQVRLYYIGGVEVFAECLSDSIFVQSPICNRYWIPATVCKIPPGCNLKIF  |                      |                     |                    | [ 404 ] |
| NvS23  | YTEPTVYCSISYYEMNTRVGETFHASQPSLTVDFGTDPSN--SDRFCLGLLSNVNRNPIEMTRRHIGRQVRLYYIGGVEVFAECLSDSIFVQSPICNRYWIPATVCKIPPGCNLKIF   |                      |                     |                    | [ 341 ] |
| HS9a   | YEEPQHWCSVAYELNRRVGETFQASRSVLIDGFTDPSNRRN-RFCLGLLSNVNRNSTIENTRRHIGKGVHLYYVGGVEVYAEVSDSIFVQSPICNRYWIPATVCKIPSGCSLKVF     |                      |                     |                    | [ 385 ] |
| HS9b   | YEEPQHWCSVAYELNRRVGETFQASRSVLIDGFTDPSNRRN-RFCLGLLSNVNRNSTIENTRRHIGKGVHLYYVGGVEVYAEVSDSIFVQSPICNRYWIPATVCKIPSGCSLKVF     |                      |                     |                    | [ 348 ] |
| XS8a   | YEEPLHWCSVAYELNRRVGETFQASARSVLIDGFTDPSNKN-RFCLGLLSNVNRNSTIENTRRHIGKGVHLYYVGGVEVYAEVSDSIFVQSPICNRYWIPSTVCKIPSGCSLKIF     |                      |                     |                    | [ 384 ] |
| XS8b   | YEEPLHWCSVAYELNRRVGETFQASARSVLIDGFTDPSNKN-RFCLGLLSNVNRNSTIENTRRHIGKGVHLYYVGGVEVYAEVSDSIFVQSPICNRYWIPSTVCKIPSGCSLKIF     |                      |                     |                    | [ 384 ] |
| HS1    | YEEPKHWCISIVYELNRRVGEAFHASSTVSLVDGFTDPSNKN-RFCLGLLSNVNRNSTIENTRRHIGKGVHLYYVGGVEVYAEVSDSIFVQSPICNRYWIPSTVCKIPSGCSLKIF    |                      |                     |                    | [ 383 ] |
| XS1    | YEEPKHWCISIVYELNRRVGEAFHASSTVSLVDGFTDPSNKN-RFCLGLLSNVNRNSTIENTRRHIGKGVHLYYVGGVEVYAEVSDSIFVQSPICNRYWIPSTVCKIPSGCSLKIF    |                      |                     |                    | [ 382 ] |
| HS5    | YEEPKHWCISIVYELNRRVGEAFHASSTVSLVDGFTDPSNKN-RFCLGLLSNVNRNSTIENTRRHIGKGVHLYYVGGVEVYAEVSDSIFVQSPICNRYWIPSTVCKIPSGCSLKIF    |                      |                     |                    | [ 383 ] |
| dMAD   | YSEPAFWASIAAYELNCRVGEVFNNSVIVDFGFTNPSNN-SDRCCQLQSLNVNRNSTIENTRRHIGKGVHLYYVGGVEVYAEVSDSIFVQSPICNRYWIPSTVCKIPPGCNLKIF     |                      |                     |                    | [ 373 ] |
| NvS15  | YQEPWSVCSIAAYELNRRVGEVFNNSVIVDFGFTNPSNN-SDRCCQLQSLNVNRNSTIENTRRHIGKGVHLYYVGGVEVYAEVSDSIFVQSPICNRYWIPSTVCKIPSGCTLKIF     |                      |                     |                    | [ 356 ] |

|        | Loop strand pocket                                                               | Trimer sites | Goes in pocket | C-term Phos. |         |
|--------|----------------------------------------------------------------------------------|--------------|----------------|--------------|---------|
| HS2    | NNQEFALLAQSVNQGFEAVYQLTRMCTIRMSFVKGWGAEYRRQTVTSTPCWIELHLNGLQWLKDLVTQMGSPSVRCSSMS |              |                |              | [ 467 ] |
| XS2    | NNQEFALLAQSVNQGFEAVYQLTRMCTIRMSFVKGWGAEYRRQTVTSTPCWIELHLNGLQWLKDLVTQMGSPSVRCSSMS |              |                |              | [ 467 ] |
| HS3    | NNQEFALLAQSVNQGFEAVYQLTRMCTIRMSFVKGWGAEYRRQTVTSTPCWIELHLNGLQWLKDLVTQMGSPSIRCSSVS |              |                |              | [ 425 ] |
| XS3    | NNQEFALLAQSVNQGFEAVYQLTRMCTIRMSFVKGWGAEYRRQTVTSTPCWIELHLNGLQWLKDLVTQMGSPSIRCSSVS |              |                |              | [ 425 ] |
| dSmad2 | NNQEFALLAQSVNQGFEAVYQLTRMCTIRMSFVKGWGAEYRRQTVTSTPCWIELHLNGLQWLKDLVTQMGSPRLPCSSMS |              |                |              | [ 486 ] |
| NvS23  | NNQEFALLAQSVNQGFEAVYQLTRMCTIRMSFVKGWGAEYRRQTVTSTPCWIELHLNGLQWLKDLVTQMGSPAPCSSVS  |              |                |              | [ 423 ] |
| HS9a   | NNQLFAQLLAQSVNHGFEVVELTKMCTIRMSFVKGWGAEYHRQDVTSTPCWIEIHLHGLQWLKDLVTQMGSPHNPISVS  |              |                |              | [ 467 ] |
| HS9b   | NNQLFAQLLAQSVNHGFEVVELTKMCTIRMSFVKGWGAEYHRQDVTSTPCWIEIHLHGLQWLKDLVTQMGSPHNPISVS  |              |                |              | [ 430 ] |
| XS8a   | NNQLFAQLLAQSVNQGFEVVELTKMCTIRMSFVKGWGAEYHRQDVTSTPCWIEIHLHGLQWLKDLVTQMGSPHNPISVS  |              |                |              | [ 466 ] |
| XS8b   | NNQLFAQLLAQSVNQGFEVVELTKMCTIRMSFVKGWGAEYHRQDVTSTPCWIEIHLHGLQWLKDLVTQMGSPHNPISVS  |              |                |              | [ 466 ] |
| HS1    | NNQEFALLAQSVNHGFEVVELTKMCTIRMSFVKGWGAEYHRQDVTSTPCWIEIHLHGLQWLKDLVTQMGSPHNPISVS   |              |                |              | [ 465 ] |
| XS1    | NNQEFALLAQSVNHGFEVVELTKMCTIRMSFVKGWGAEYHRQDVTSTPCWIEIHLHGLQWLKDLVTQMGSPHNPISVS   |              |                |              | [ 464 ] |
| HS5    | NNQEFALLAQSVNHGFEVVELTKMCTIRMSFVKGWGAEYHRQDVTSTPCWIEIHLHGLQWLKDLVTQMGSPHNPISVS   |              |                |              | [ 465 ] |
| dMAD   | NNQEFALLAQSVNNGFEVVELTKMCTIRMSFVKGWGAEYHRQDVTSTPCWIEIHLHGLQWLKDLVTQMGSPHNPISVS   |              |                |              | [ 455 ] |
| NvS15  | NNQEFALLAQSVNNGFEVVELTKMCTIRMSFVKGWGAEYHRQDVTSTPCWIEIHLHGLQWLKDLVTQMGSPHNPISVS   |              |                |              | [ 438 ] |
