# Supplementary material for: Conservation and evolutionary divergence in the activity of receptor-regulated smads
Source: PubMed Central journal article supplement (PMC3500652; doi:10.1186/2041-9139-3-22), 2012-10-01
Supplement: 2041-9139-3-22-S2.pdf [file 2041-9139-3-22-S2.pdf]

## Additional File 2

| <b>Gene</b>                                            | <b>Animal</b>       | <b>Protein Accession #</b> | <b>AA Length</b> | <b>MH1</b> | <b>MH2</b> |
|--------------------------------------------------------|---------------------|----------------------------|------------------|------------|------------|
| Smad1                                                  | Human               | AAH01878.1                 | 465              | 12-132     | 265-441    |
| Smad5                                                  | Human               | AAB95090.1                 | 465              | 10-133     | 265-465    |
| Smad9A                                                 | Human               | NP_001120689.1             | 467              | 13-136     | 267-467    |
| Smad9B                                                 | Human               | NP_005896.1                | 430              | 13-136     | 230-430    |
| Smad1                                                  | <i>Xenopus</i>      | NP_001079973               | 464              | 09-132     | 264-464    |
| Smad8A                                                 | <i>Xenopus</i>      | AAL86772.1                 | 466              | 13-136     | 266-466    |
| Smad8B                                                 | <i>Xenopus</i>      | AAL86773.1                 | 468              | 13-136     | 266-466    |
| MAD                                                    | <i>Drosophila</i>   | AAF51142                   | 455              | 23-146     | 255-455    |
| Smad1/5                                                | <i>Nematostella</i> | ABC88374.1                 | 438              | 10-133     | 237-438    |
|                                                        |                     |                            |                  |            |            |
| Smad2                                                  | Human               | AAC39657.1                 | 467              | 56-172     | 268-443    |
| Smad3                                                  | Human               | AAL68976.1                 | 425              | 08-132     | 224-414    |
| Smad2                                                  | <i>Xenopus</i>      | NP_001084964.1             | 467              | 08-172     | 266-465    |
| Smad3                                                  | <i>Xenopus</i>      | NP_001079320               | 425              | 08-132     | 224-414    |
| SMOX (dSmad2)                                          | <i>Drosophila</i>   | NP_511079                  | 486              | 07-130     | 285-475    |
| "Smad2/3"                                              | <i>Nematostella</i> | XP_001631657               | 423              | 08-130     | 222-412    |
|                                                        |                     |                            |                  |            |            |
| * <i>Xenopus laevis</i> does not have a Smad5 ortholog |                     |                            |                  |            |            |
