# Supplementary material for: Conservation and evolutionary divergence in the activity of receptor-regulated smads
Source: PubMed Central journal article supplement (PMC3500652; doi:10.1186/2041-9139-3-22), 2012-10-01
Supplement: 2041-9139-3-22-S4.pdf [file 2041-9139-3-22-S4.pdf]

## Additional File 4

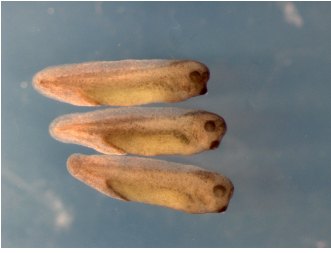

Wild type

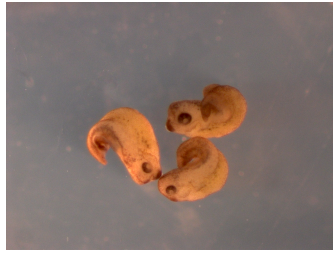

"Perturbed" axis

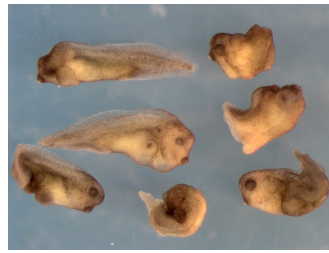

"Perturbed" axis

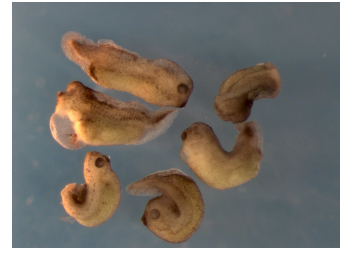

"Perturbed" axis
