# Supplementary material for: Conservation and evolutionary divergence in the activity of receptor-regulated smads
Source: PubMed Central journal article supplement (PMC3500652; doi:10.1186/2041-9139-3-22), 2012-10-01

# Additional File 5

## Goosecoid

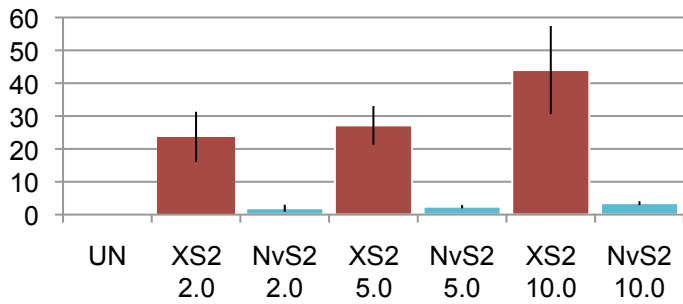

## Chordin

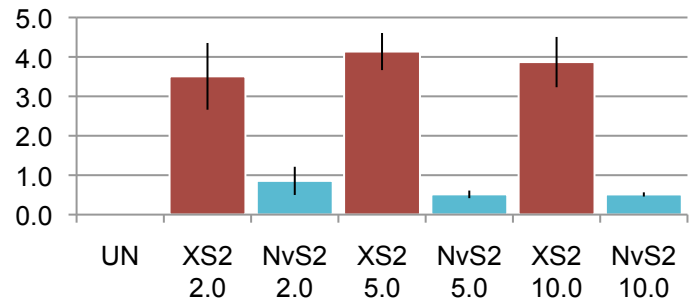

## Noggin

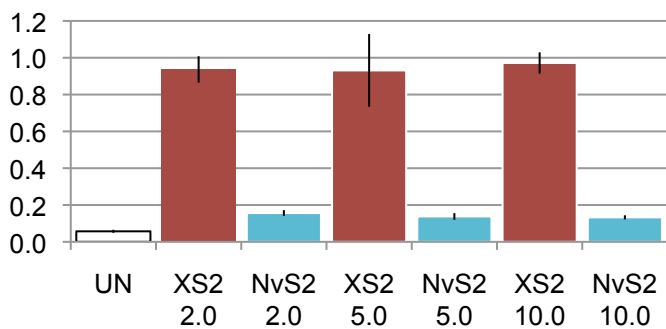

## Follistatin

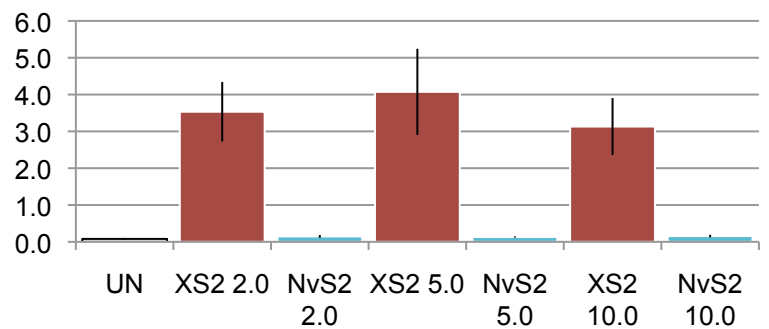

## Mixer

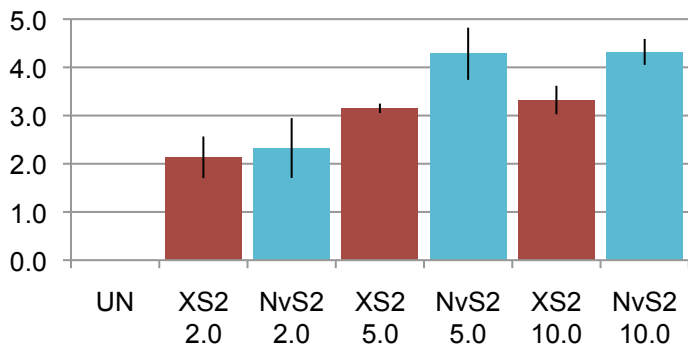

## Mix2

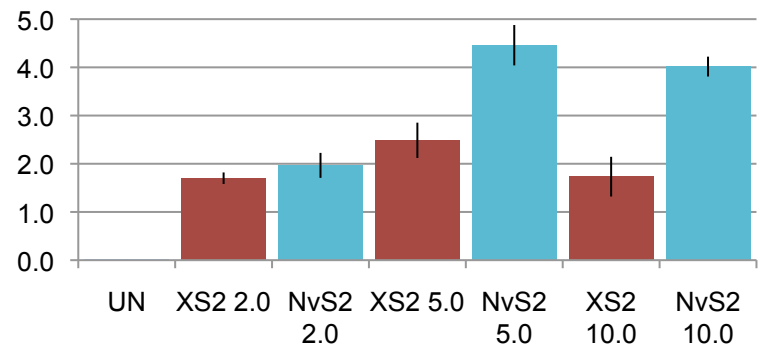

## Sox17 $\alpha$

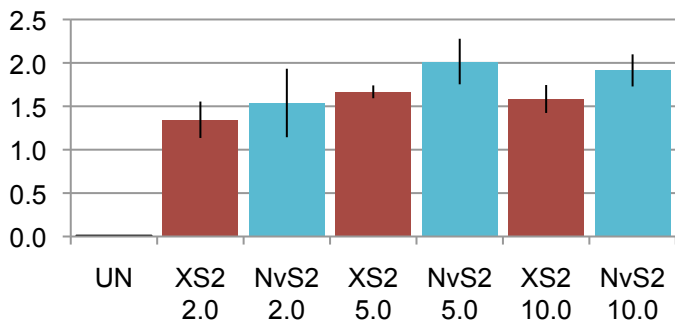

Supplement: 2041-9139-3-22-S5.pdf [file 2041-9139-3-22-S5.pdf]
