# Supplementary material for: Conservation and evolutionary divergence in the activity of receptor-regulated smads
Source: PubMed Central journal article supplement (PMC3500652; doi:10.1186/2041-9139-3-22), 2012-10-01

## Additional File 6

### MH1 Chimera

| Number | Region         | Description                  | 5'-3' Sequence                          |
|--------|----------------|------------------------------|-----------------------------------------|
| 1      | X MH1          | F X start region             | ATG TCC TCG ATT TTG CCA TTC CCC CAC CA  |
| 2      |                | R X MH1 end + N linker start | GAA GAA CTG GTG TCT CTA CCC TCT CAT AAT |
| 3      | N Linker + MH2 | F X MH1 end + N linker start | GGT AGA GAC ACC AGT TCT TCC ACC AGT GTT |
| 4      |                | R N end region               | TCA CGA GAC AGA GGA GCA GGG GGC AGA GGG |

### Linker Chimera

| Number | Region   | Description                  | 5'-3' Sequence                          |
|--------|----------|------------------------------|-----------------------------------------|
| 5      | N MH1    | F N start region             | ATG ACT TCC CTG TTG CCT TTT ACT CCT CCA |
| 6      |          | R N MH1 end X linker start   | GTA AAA CTG GAG TCT CAA CCC GCT GGT AGT |
| 7      | X Linker | F N MH1 end + X linker start | GGT TGA GAC TCC AGT TTT ACC GCC GGT ATT |
| 8      |          | R X linker end + N MH2 start | TGG CTC TGT ATA GGT GAC AGG TTG CAA ATC |
| 9      | N MH2    | F X linker end + N MH2 start | CTG TCA CCT ATA CAG AGC CAA CAT ACT GGT |
| 4      |          | R N end region               | Same as 4                               |

### MH2 Chimera

| Number | Region         | Description                  | 5'-3' Sequence                          |
|--------|----------------|------------------------------|-----------------------------------------|
| 5      | N MH1 + Linker | F N start region             | Same as 5                               |
| 10     |                | R N linker end + X MH2 start | AGG TTC CGA ATA CTG TAT AGG CTG TGC ATC |
| 11     | X MH2          | F N linker end + X MH2 start | CTA TAC AGT ATT CGG AAC CTG CTT TTT GGT |
| 12     |                | R X end region               | TTA GGA CAT GCT TGA GCA GCG GAC TGA AGG |

### MH1 chimera:

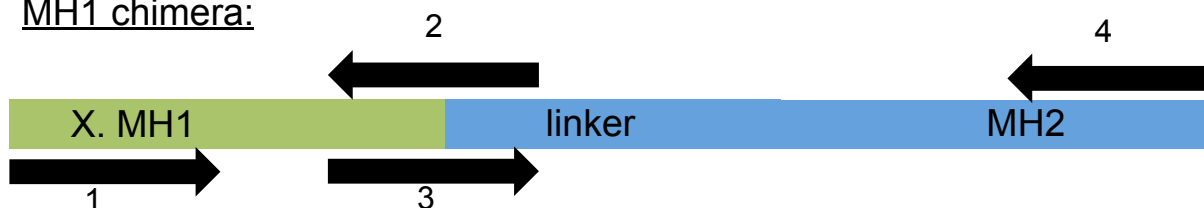

### Linker chimera:

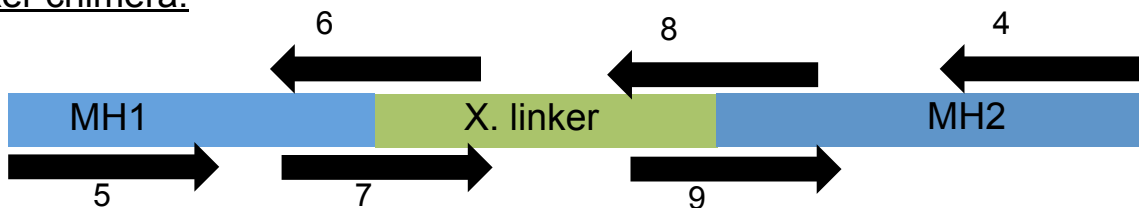

### MH2 chimera:

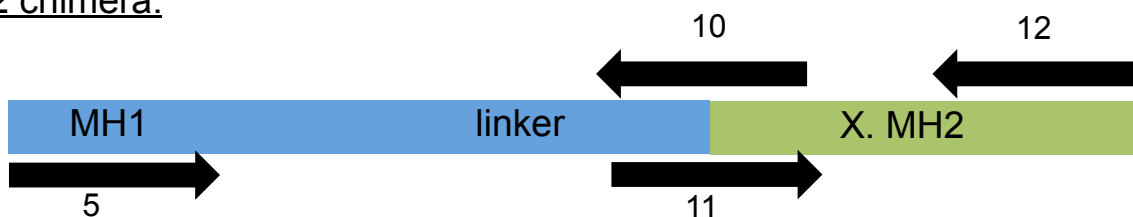

Supplement: 2041-9139-3-22-S6.pdf [file 2041-9139-3-22-S6.pdf]
