# Supplementary material for: Conservation and evolutionary divergence in the activity of receptor-regulated smads
Source: PubMed Central journal article supplement (PMC3500652; doi:10.1186/2041-9139-3-22), 2012-10-01
Supplement: 2041-9139-3-22-S7.pdf [file 2041-9139-3-22-S7.pdf]

## Additional File 7

| Gene         | Reference             | Sequence                                                                          | Denature   | Anneal/<br>time | Extend/<br>time | Acquis/<br>time |
|--------------|-----------------------|-----------------------------------------------------------------------------------|------------|-----------------|-----------------|-----------------|
| Goosecoid    | Xanthos et al, 2002   | U: 5'-TTC ACC GAT GAA CAA CTG GA-3'<br>D: 5'-TTC CAC TTT TGG GCA TTT TC -3'       | 95         | 55/5            | 72/11           | 82/3            |
| ADMP         | Sander et al, 2007    | U: 5'-GAT GAT GGA AGG AGA GGA-3'<br>D: 5'-TCA TGT TCT GAC CCA AAG-3'              | 95/30      | 55/60           | 72/30           |                 |
| Chordin      | XMMR/Xanthos 2002     | U: 5'-AAC TGC CAG GAC TGG ATG GT-3'<br>D: 5'-GGC AGG ATT TAG AGT TGC TTC-3'       | 95         | 55/5            | 72/12           | 81/3            |
| Noggin       | XMMR/Xanthos 2002     | U: 5'-AGT TGC AGA TGT GGC TCT-3'<br>D: 5'-AGT CCA AGA GTC TGA GCA-3'              | 95         | 55/5            | 72/12           | 84/3            |
| Follistatin  | Agius et al, 2000     | U: 5'-CAG TGC AGC GCT GGA AAG AAA T-3'<br>D: 5'-TGC GTTGCG GTA ATT CAC TTA C-3'   | Unreported |                 |                 |                 |
| Eomesodermin | Thomsen Lab, unpub    | U: 5'-TCC TGT CCC CAC AGA CTA ATG-3'<br>D: 5'-TGA AGG ACT TGA CCT TGA GGA-3'      | 95         | 55/5            | 72/12           | 81/3            |
| Mixer        | Henry and Melton 1998 | U: 5'-CAC CAG CCC AGC ACT TAA CC-3'<br>D: 5'-CAA TGT CAC ATC AAC TGA AG-3'        | 95         | 55/5            | 72/12           | 83/3            |
| Mix.2        | Xanthos et al, 2001   | U: 5'-TGC AAG CCA TCA TTA TTC TAG C-3'<br>D: 5'-AGG AAC CTC TGC CTC GAG ACA T-3'  | 95         | 55/5            | 72/11           | 83/3            |
| Xsox17       | Xanthos et al, 2001   | U: 5'-GCA AGA TGC TTG GCA AGT CG-3'<br>D: 5'-GCT GAA GTT CTC TAG ACA CA-3'        | 95         | 58/5            | 72/8            | 85/3            |
| Xbrachyury   | Sun et al, 1999       | U: 5'-TTC TGA AGG TGA GCA TGT CG-3'<br>D: 5'-GTT TGA CTT TGC TAA AAG AGA CAG G-3' | 95         | 55/5            | 72/9            | 75/3            |
| ODC          | Cao et al, 2006       | U: 5'-CAA AGC TTG TTC TAC GCA TAG CA-3'<br>D: 5'-GGT GGC ACC AAA TTT CAC ACT-3'   | 95         | 55/5            | 72/5            |                 |
| Xvent1       | Gawantka et al, 1995  | U: 5'-GCA TCT CCT TGG CAT ATT TGG-3'<br>D: 5'-TTC CCT TCA GCA TGG TTC ACC-3'      | 95         | 62/5            | 72/20           | 83/3            |
| Xvent2       | Kofron et al, 2001    | U: 5'-TGA GAC TTG GGC ACT GTC TG-3'<br>D: 5'-CCT CTG TTG AAT GGC TTG CT-3'        | 95         | 62/5            | 72/20           | 83/3            |
| Msx1         | DeRobertis, unpub     | U: 5'-GCT AAA AAT GGC TGC TAA-3'<br>D: 5'-AGG TGG GCT GTG TAA AGT-3'              | 95         | 55              | 72              |                 |
| Xhox3        | Suzuki et al., 1995   | U: 5'-ATA TGA TGA GCC ACG CAG CAG-3'<br>D: 5'-CAG ATG CTG CAG CTC TTT GGC-3'      | Unreported |                 |                 |                 |

Agius, E. *et al.* 2000. Endodermal Nodal-related signals and mesoderm induction in *Xenopus*. *Development* 127: 1173-1183.

Cao, Y. *et al.* 2006. *Xenopus* POU factors of subclass V inhibit activin.nodal signaling during gastrulation. *Mechanisms of Development* 123:614-625

Gawantka, V. *et al.* 1995. Antagonizing the Spemann organizer: role of the homeobox gene *Xvent-1*. *The EMBO Journal* 14 (24):6268-6279.

Henry, G.L. and D.A. Melton. 1998. *Mixer*, a Homeobox Gene Required for Endoderm Development. *Sciec*: 281:91-96.

Kofron, M. *et al.* 2001. The Role of Maternal Axin in Patterning the *Xenopus* Embryo. *Developmental Biology* 237:183-201.

Sander, V. *et al.* 2007. The opposing homeobox genes *Goosecoid* and *Vent1/2* self-regulate *Xenopus* patterning. *The EMBO Journal* 26:2955-2965.

Sun, B.I. *et al.* 1999. *derriere*: a TGF $\beta$  family member required for posterior development in *Xenopus*. *Development* 126:1467-1482.

Suzuki, A. *et al.* 1995. Bone Morphogenetic Protein acts as a ventral mesoderm modifier in early *Xenopus* embryos. *Development, Growth, & Differentiation* 37:581-588.

Xanthos, J.B. *et al.* 2002. The roles of three signaling pathways in the formation and function of the Spemann organizer. *Development* 129:4027-4043.
